# Supplementary material
Source: Springer Nature journal article supplement (https://www.springermedizin.de/resource/supplementary/13256_2010_1600_MOESM1_ESM.pdf/9648028)

FoV: 359 mm

Time: ms

Slice: 2 mm

Pos: -437

HFS

F: B

239 mA

120 kV

Image no: 399

Image 399 of 605

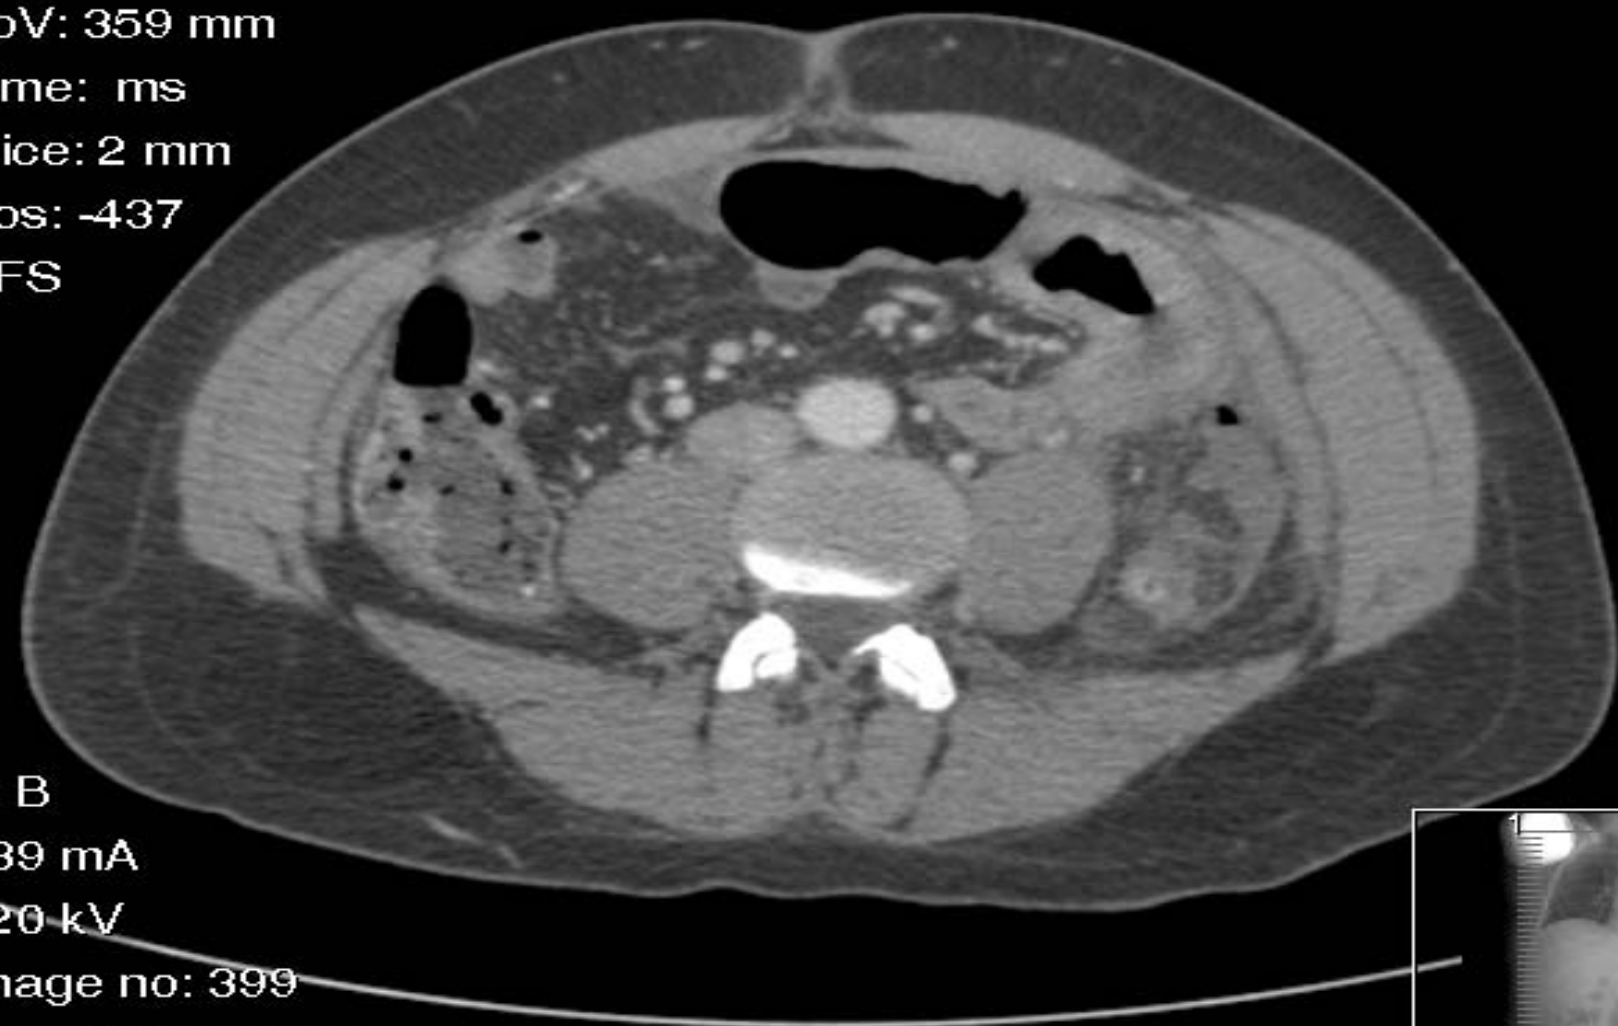

P

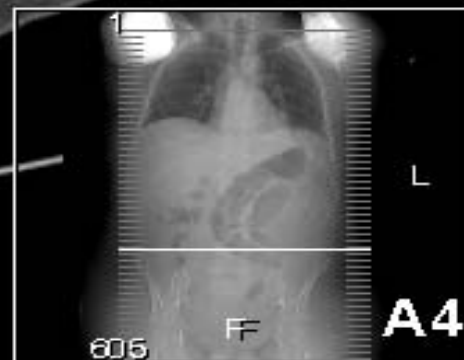

A4

605

F

Supplement: MOESM1 [file 9648028]
